# Supplementary material
Source: PubMed Central journal article supplement (PMC6583822)
Supplement: jamasurg-154-579-s002.pdf [file jamasurg-154-579-s002.pdf]

## Supplementary Online Content

Eltorai AEM, Baird GL, Eltorai AS, et al. Effect of an incentive spirometer patient reminder following coronary artery bypass grafting: a randomized clinical trial. *JAMA Surg*. Published online April 10, 2019. doi:10.1001/jamasurg.2019.0520

**eTable 1.** Subject motivational factors

**eTable 2.** Modified Wilcox radiographic atelectasis severity scoring *per lung*

**eTable 3.** Subject characteristics

**eTable 4.** Subject motivational factors

**eTable 5.** Mean daily IS inspiratory volumes

**eTable 6.** Rate of change of pulmonary function tests

**eTable 7.** High-flow nasal cannula and non-rebreather mask use duration

**eTable 8.** Noninvasive positive pressure ventilation use duration

**eTable 9.** Reintubation and tracheostomy

**eTable 10.** Postoperative pulmonary complication rates

**eTable 11.** Discharge location

**eTable 12.** In-hospital causes of death

**eTable 13.** Daily nursing workload

This supplementary material has been provided by the authors to give readers additional information about their work.

**Table S1.** Subject motivational factors

| <b>Motivational factor</b>              | <b>Question</b>                                                                           | <b>Response range</b>                         |
|-----------------------------------------|-------------------------------------------------------------------------------------------|-----------------------------------------------|
| <b><i>Self-efficacy</i></b>             | How confident are you that you will be able to make a full recovery after surgery?        | 1 (Not at all confident) – 6 (Highly certain) |
| <b><i>Effort attribution</i></b>        | Your effort is important for the success of your recovery.                                | 1 (Strongly disagree) – 6 (Strongly agree)    |
| <b><i>Implicit theory of change</i></b> | No matter how hard you try, you can't really change how successful your recovery will be. |                                               |
| <b><i>Locus of control</i></b>          | You have a lot of control over how successful your recovery will be.                      |                                               |

**Table S2.** Modified Wilcox radiographic atelectasis severity scoring *per lung*

| <b>Score</b> | <b>Description</b>                                                    |
|--------------|-----------------------------------------------------------------------|
| 0            | No atelectasis                                                        |
| 1            | Plate atelectasis                                                     |
| 2            | Segmental atelectasis (mild lobar collapse)                           |
| 3            | Partial lobar atelectasis (moderate lobar collapse)                   |
| 4            | Complete atelectasis of one lung lobe                                 |
| 5            | Complete atelectasis of one lung lobe in addition to any of the above |

Table S3. Subject characteristics

|                      | Variable                 |                 | Per-protocol              |                      |                  | Intent-to-treat  |                      |                  |                  |        |
|----------------------|--------------------------|-----------------|---------------------------|----------------------|------------------|------------------|----------------------|------------------|------------------|--------|
|                      |                          |                 | Control Bell OFF          | Experimental Bell ON | P value          | Control Bell OFF | Experimental Bell ON | P value          |                  |        |
| Preoperative factors | Number of patients       |                 | Overall                   | n=74                 | n=71             | 0.5889           | n=80                 | n=80             | 0.9999           |        |
|                      |                          |                 | Non-elective              | n=43                 | n=47             | 0.3923           | n=45                 | n=51             | 0.4199           |        |
|                      |                          |                 | Elective                  | n=31                 | n=24             | 0.3923           | n=35                 | n=29             | 0.4199           |        |
|                      | Age, years, mean (95%CI) |                 | Overall                   | 69.7 (67.5-72.0)     | 67.5 (65.2-69.9) | 0.1028           | 69.9 (67.7-72.1)     | 67.5 (65.4-69.6) | 0.0586           |        |
|                      |                          |                 | Non-elective              | 69.1 (66.1-72.0)     | 66.9 (64.3-69.6) | 0.2898           | 69.0 (66.2-71.9)     | 66.8 (64.3-69.3) | 0.2420           |        |
|                      |                          |                 | Elective                  | 70.7 (67.0-74.3)     | 68.7 (63.9-73.4) | 0.4930           | 70.9 (67.5-74.4)     | 68.7 (64.6-72.8) | 0.3990           |        |
|                      | Male, %                  |                 | Overall                   | 78.4% [n=58]         | 76.1 [n=54]      | 0.8435           | 77.5% [n=62]         | 76.3% [n=61]     | 0.9999           |        |
|                      |                          |                 | Non-elective              | 48.6% [n=36]         | 50.7% [n=36]     | 0.8686           | 46.3% [n=37]         | 48.8% [n=39]     | 0.6162           |        |
|                      |                          |                 | Elective                  | 29.7% [n=22]         | 25.4% [n=18]     | 0.5820           | 31.3% [n=25]         | 27.5% [n=22]     | 0.7803           |        |
|                      | BMI, mean (95%CI)        |                 | Overall                   | 31.0 (29.8-32.2)     | 30.6 (29.4-31.7) | 0.6535           | 31.0 (29.9-32.2)     | 30.7 (29.6-31.8) | 0.8125           |        |
|                      |                          |                 | Non-elective              | 30.3 (28.9-31.8)     | 30.5 (29.2-31.8) | 0.8616           | 30.6 (29.0-32.1)     | 30.7 (29.4-31.9) | 0.9465           |        |
|                      |                          |                 | Elective                  | 31.9 (29.9-33.9)     | 30.7 (28.2-33.1) | 0.4352           | 31.6 (29.7-33.6)     | 30.9 (28.8-33.0) | 0.5786           |        |
|                      | ASA class, mean (95%CI)  |                 | Overall                   | 4.0 (3.9-4.0)        | 4.0 (3.9-4.0)    | 0.9666           | 4.0 (3.9-4.0)        | 4.0 (3.9-4.0)    | 0.6506           |        |
|                      |                          |                 | Non-elective              | 4.0 (3.9-4.0)        | 4.0 (3.9-4.0)    | 0.6152           | 4.0 (3.9-4.0)        | 3.9 (3.8-4.0)    | 0.3046           |        |
|                      |                          |                 | Elective                  | 4.0 (3.9-4.0)        | 4.0 (4.0-4.0)    | 0.3839           | 4.0 (3.9-4.0)        | 4.0 (4.0-4.0)    | 0.3669           |        |
|                      | FEV1                     |                 | L, mean (95%CI)           | Overall              | 2.0 (1.8-2.1)    | 2.0 (1.8-2.2)    | 0.9939               | 2.0 (1.8-2.2)    | 2.0 (1.9-2.2)    | 0.6813 |
|                      |                          |                 |                           | Non-elective         | 1.9 (1.7-2.2)    | 2.0 (1.7-2.2)    | 0.9369               | 2.0 (1.7-2.2)    | 2.0 (1.7-2.2)    | 0.9021 |
|                      |                          |                 |                           | Elective             | 2.1 (1.8-2.3)    | 2.1 (1.8-2.4)    | 0.9669               | 2.1 (1.8-2.3)    | 2.2 (1.9-2.5)    | 0.5088 |
|                      |                          |                 | % predicted, mean (95%CI) | Overall              | 71.4 (66.8-76.0) | 70.1 (64.9-75.3) | 0.7035               | 70.9 (66.1-75.6) | 68.7 (63.3-74.1) | 0.5478 |
|                      |                          |                 |                           | Non-elective         | 66.5 (60.1-73.0) | 68.0 (60.9-75.1) | 0.7561               | 67.4 (61.1-73.6) | 68.2 (61.3-75.2) | 0.8554 |
|                      |                          |                 |                           | Elective             | 77.0 (70.6-83.3) | 70.0 (62.3-77.7) | 0.1695               | 76.6 (70.4-82.9) | 73.2 (65.9-80.5) | 0.4902 |
| FVC                  |                          | L, mean (95%CI) | Overall                   | 2.5 (2.3-2.7)        | 2.6 (2.3-2.8)    | 0.5300           | 2.5 (2.3-2.7)        | 2.6 (2.4-2.8)    | 0.3545           |        |
|                      |                          |                 | Non-elective              | 2.4 (2.1-2.6)        | 2.5 (2.2-2.8)    | 0.5836           | 2.4 (2.1-2.6)        | 2.5 (2.2-2.8)    | 0.5817           |        |
|                      |                          |                 | Elective                  | 2.6 (2.3-2.9)        | 2.7 (2.4-3.1)    | 0.5860           | 2.6 (2.3-2.8)        | 2.8 (2.5-3.1)    | 0.2893           |        |
|                      |                          | Overall         | 64.5 (60.5-68.5)          | 65.5 (61.0-70.0)     | 0.7592           | 65.1 (61.3-68.9) | 66.1 (61.9-70.4)     | 0.7148           |                  |        |

|                                 |                                               |                           |                |                          |                          |                     |                          |                          |                     |               |
|---------------------------------|-----------------------------------------------|---------------------------|----------------|--------------------------|--------------------------|---------------------|--------------------------|--------------------------|---------------------|---------------|
|                                 |                                               | % predicted, mean (95%CI) | Non-elective   | 59.8 (54.6-64.9)         | 64.1 (57.7-70.4)         | 0.2986              | 60.6 (55.5-65.6)         | 64.0 (57.9-70.1)         | 0.3964              |               |
|                                 |                                               |                           | Elective       | 71.1 (65.6-76.6)         | 68.1 (36.4-72.9)         | 0.4171              | 70.9 (65.7-76.1)         | 69.9 (65.2-74.5)         | 0.7726              |               |
| OSA, %                          |                                               |                           | <b>Overall</b> | <b>21.6% [n=16]</b>      | <b>21.1% [n=15]</b>      | <b>0.9999</b>       | <b>20.0% [n=16]</b>      | <b>22.5% [n=18]</b>      | <b>0.8470</b>       |               |
|                                 |                                               |                           | Non-elective   | 12.2% [n=9]              | 14.1% [n=10]             | 0.9999              | 11.3% [n=9]              | 15.0% [n=12]             | 0.8058              |               |
|                                 |                                               |                           | Elective       | 9.5% [n=7]               | 7.0% [n=5]               | 0.9999              | 8.8% [n=7]               | 7.5% [n=6]               | 0.9999              |               |
| Asthma, %                       |                                               |                           | <b>Overall</b> | <b>5.4% [n=4]</b>        | <b>8.5% [n=6]</b>        | <b>0.5272</b>       | <b>6.3% [n=5]</b>        | <b>7.5% [n=6]</b>        | <b>0.9999</b>       |               |
|                                 |                                               |                           | Non-elective   | 1.4% [n=1]               | 4.2% [n=3]               | 0.6180              | 12.5% [n=1]              | 3.8% [n=3]               | 0.6200              |               |
|                                 |                                               |                           | Elective       | 4.1% [n=3]               | 4.2% [n=3]               | 0.9999              | 5.0% [n=4]               | 3.8% [n=3]               | 0.9999              |               |
| Smoker, %                       | Current                                       |                           |                | <b>Overall</b>           | <b>9.5% [n=7]</b>        | <b>7.0% [n=5]</b>   | <b>0.8497</b>            | <b>10.0% [n=8]</b>       | <b>7.5% [n=6]</b>   | <b>0.7924</b> |
|                                 |                                               |                           |                | Non-elective             | 8.1% [n=6]               | 5.6% [n=4]          | 0.5956                   | 7.5% [n=6]               | 6.3% [n=5]          | 0.8416        |
|                                 |                                               |                           |                | Elective                 | 1.4% [n=1]               | 1.4% [n=1]          | 0.9999                   | 2.5% [n=2]               | 1.3% [n=1]          | 0.4748        |
|                                 | Former                                        |                           |                | <b>Overall</b>           | <b>51.4% [n=38]</b>      | <b>54.9% [n=39]</b> | <b>0.8497</b>            | <b>53.8% [n=43]</b>      | <b>52.5% [n=42]</b> | <b>0.7924</b> |
|                                 |                                               |                           |                | Non-elective             | 27.0% [n=20]             | 36.6% [n=26]        | 0.5956                   | 27.5% [n=22]             | 35.0% [n=28]        | 0.8416        |
|                                 |                                               |                           |                | Elective                 | 24.3% [n=18]             | 18.3% [n=13]        | 0.9999                   | 26.3% [n=21]             | 17.5% [n=14]        | 0.4748        |
|                                 | Never                                         |                           |                | <b>Overall</b>           | <b>39.2% [n=29]</b>      | <b>38.0% [n=27]</b> | <b>0.8497</b>            | <b>36.3% [n=29]</b>      | <b>40.0% [n=32]</b> | <b>0.7924</b> |
|                                 |                                               |                           |                | Non-elective             | 23.0% [n=17]             | 23.9% [n=17]        | 0.5956                   | 21.3% [n=17]             | 22.5% [n=18]        | 0.8416        |
|                                 |                                               |                           |                | Elective                 | 16.2% [n=12]             | 14.1% [n=10]        | 0.9999                   | 15.0% [n=12]             | 17.5% [n=14]        | 0.4748        |
| Pack-years, mean (95%CI)        |                                               |                           | <b>Overall</b> | <b>11.4 (5.8-17.1)</b>   | <b>8.0 (4.5-11.4)</b>    | <b>0.8389</b>       | <b>12.3 (6.8-17.9)</b>   | <b>7.3 (4.1-10.4)</b>    | <b>0.4402</b>       |               |
|                                 |                                               |                           | Non-elective   | 6.2 (1.9-10.5)           | 7.0 (2.9-11.0)           | 0.7076              | 6.0 (1.9-10.1)           | 6.7 (3.0-10.5)           | 0.5846              |               |
|                                 |                                               |                           | Elective       | 18.6 (6.5-30.8)          | 9.9 (2.9-16.8)           | 0.2045              | 20.5 (9.3-31.8)          | 8.2 (2.3-14.0)           | 0.1580              |               |
| COPD, %                         |                                               |                           | <b>Overall</b> | <b>13.5% [n=10]</b>      | <b>15.5% [n=11]</b>      | <b>0.8155</b>       | <b>13.8% [n=11]</b>      | <b>15.0% [n=12]</b>      | <b>0.9999</b>       |               |
|                                 |                                               |                           | Non-elective   | 9.5% [n=7]               | 9.9% [n=7]               | 0.9999              | 8.8% [n=7]               | 10.0% [n=8]              | 0.9999              |               |
|                                 |                                               |                           | Elective       | 4.1% [n=3]               | 5.6% [n=4]               | 0.6862              | 5.0% [n=4]               | 5.0% [n=4]               | 0.9999              |               |
| Diabetes mellitus, %            |                                               |                           | <b>Overall</b> | <b>52.7% [n=39]</b>      | <b>43.7% [n=31]</b>      | <b>0.3200</b>       | <b>51.3% [n=41]</b>      | <b>43.8% [n=35]</b>      | <b>0.4287</b>       |               |
|                                 |                                               |                           | Non-elective   | 35.1% [n=26]             | 29.6% [n=21]             | 0.1462              | 33.8% [n=27]             | 27.5% [n=22]             | 0.1076              |               |
|                                 |                                               |                           | Elective       | 17.6% [n=13]             | 14.1% [n=10]             | 0.9999              | 17.5% [n=14]             | 16.3% [n=13]             | 0.8009              |               |
| GERD, %                         |                                               |                           | <b>Overall</b> | <b>25.7% [n=19]</b>      | <b>23.9% [n=17]</b>      | <b>0.8493</b>       | <b>25.0% [n=20]</b>      | <b>25.0% [n=20]</b>      | <b>0.9999</b>       |               |
|                                 |                                               |                           | Non-elective   | 12.2% [n=9]              | 11.3% [n=8]              | 0.7885              | 11.3% [n=9]              | 10.0% [n=8]              | 0.6035              |               |
|                                 |                                               |                           | Elective       | 13.5% [n=10]             | 12.7% [n=9]              | 0.7780              | 13.8% [n=11]             | 15.0% [n=12]             | 0.4433              |               |
| SpO <sub>2</sub> , mean (95%CI) |                                               |                           | <b>Overall</b> | <b>97.1% (96.7-97.5)</b> | <b>97.2% (96.7-97.6)</b> | <b>0.6502</b>       | <b>97.2% (96.8-97.6)</b> | <b>97.3% (96.8-97.7)</b> | <b>0.5719</b>       |               |
|                                 |                                               |                           | Non-elective   | 97.0% (96.4-97.6)        | 97.2% (96.7-97.7)        | 0.5558              | 97.0 (96.4-97.6)         | 97.1 (96.6-97.7)         | 0.6527              |               |
|                                 |                                               |                           | Elective       | 97.3% (96.7-97.9)        | 97.0% (96.3-97.8)        | 0.6346              | 97.4% (96.9-98.0)        | 97.5 (96.8-98.2)         | 0.9028              |               |
| Perioperative factors           | Duration of anesthesia, minutes, mean (95%CI) |                           | <b>Overall</b> | <b>294 (282-312)</b>     | <b>288 (276-306)</b>     | <b>0.6808</b>       | <b>294 (282-312)</b>     | <b>300 (282-318)</b>     | <b>0.7848</b>       |               |
|                                 |                                               |                           | Non-elective   | 294 (276-318)            | 288 (270-306)            | 0.6201              | 294 (276-312)            | 294 (276-312)            | 0.9283              |               |
|                                 |                                               |                           | Elective       | 294 (270-318)            | 288 (252-324)            | 0.8579              | 300 (276-318)            | 300 (264-342)            | 0.8159              |               |
|                                 |                                               |                           | <b>Overall</b> | <b>114 (102-126)</b>     | <b>114 (102-120)</b>     | <b>0.7956</b>       | <b>114 (102-126)</b>     | <b>114 (102-120)</b>     | <b>0.8138</b>       |               |

|                                                           |                                                      |                |                     |                     |                     |                     |                     |                     |               |
|-----------------------------------------------------------|------------------------------------------------------|----------------|---------------------|---------------------|---------------------|---------------------|---------------------|---------------------|---------------|
| Duration of cardiopulmonary bypass, minutes, mean (95%CI) |                                                      | Non-elective   | 114 (96-126)        | 114 (102-120)       | 0.8955              | 114 (96-126)        | 114 (102-120)       | 0.9710              |               |
|                                                           |                                                      | Elective       | 114 (96-132)        | 114 (90-132)        | 0.7501              | 114 (96-132)        | 108 (90-132)        | 0.7167              |               |
| Duration of aortic cross clamp, minutes, mean (95%CI)     |                                                      | <b>Overall</b> | 93 (83-102)         | 90 (81-99)          | 0.6773              | 92 (83-101)         | 90 (81-99)          | 0.7518              |               |
|                                                           |                                                      | Non-elective   | 89 (77-100)         | 88 (77-98)          | 0.8723              | 88 (77-99)          | 88 (78-98)          | 0.9667              |               |
|                                                           |                                                      | Elective       | 98 (83-113)         | 95 (77-113)         | 0.7995              | 97 (84-111)         | 93 (75-112)         | 0.7317              |               |
| Number of vessels bypassed (95%CI)                        |                                                      | <b>Overall</b> | <b>3 (3-3)</b>      | <b>3 (3-3)</b>      | <b>0.6847</b>       | <b>3 (3-3)</b>      | <b>3 (3-3)</b>      | <b>0.6234</b>       |               |
|                                                           |                                                      | Non-elective   | 3 (3-3)             | 3 (3-3)             | 0.2950              | 3 (3-3)             | 3 (3-3)             | 0.2506              |               |
|                                                           |                                                      | Elective       | 3 (2-3)             | 3 (2-3)             | 0.4741              | 3 (2-3)             | 3 (2-3)             | 0.4998              |               |
| Graft type                                                | Left internal mammary artery, %                      | <b>Overall</b> | <b>89.2% [n=66]</b> | <b>98.6% [n=70]</b> | <b>0.0337</b>       | <b>87.5% [n=70]</b> | <b>97.5% [n=78]</b> | <b>0.0317</b>       |               |
|                                                           |                                                      | Non-elective   | 90.7% [n=39]        | 100% [n=47]         | 0.0483              | 91.1% [n=41]        | 100% [n=51]         | 0.0449              |               |
|                                                           |                                                      | Elective       | 87.1% [n=27]        | 95.8% [n=23]        | 0.3728              | 82.9% [n=29]        | 93.1% [n=27]        | 0.2754              |               |
|                                                           | Right internal mammary artery, %                     | <b>Overall</b> | <b>6.8% [n=5]</b>   | <b>14.1% [n=10]</b> | <b>0.1786</b>       | <b>7.5% [n=6]</b>   | <b>15.0% [n=12]</b> | <b>0.2101</b>       |               |
|                                                           |                                                      | Non-elective   | 9.3% [n=4]          | 14.9% [n=7]         | 0.5268              | 8.9% [n=4]          | 17.6% [n=9]         | 0.2457              |               |
|                                                           |                                                      | Elective       | 3.2% [n=1]          | 12.5% [n=3]         | 0.3074              | 5.7% [n=2]          | 10.3% [n=3]         | 0.6515              |               |
|                                                           | Bilateral internal mammary artery, %                 | <b>Overall</b> | <b>5.4% [n=4]</b>   | <b>14.1% [n=10]</b> | <b>0.0952</b>       | <b>6.3% [n=5]</b>   | <b>15.0% [n=12]</b> | <b>0.1218</b>       |               |
|                                                           |                                                      | Non-elective   | 7.0% [n=3]          | 14.9% [n=7]         | 0.3202              | 6.7% [n=3]          | 17.6% [n=9]         | 0.1300              |               |
|                                                           |                                                      | Elective       | 3.2% [n=1]          | 12.5% [n=3]         | 0.3074              | 5.7% [n=2]          | 10.3% [n=3]         | 0.6515              |               |
|                                                           | Saphenous vein, %                                    | <b>Overall</b> | <b>91.9% [n=68]</b> | <b>93.0% [n=66]</b> | <b>0.9999</b>       | <b>91.3% [n=73]</b> | <b>93.8% [n=75]</b> | <b>0.7655</b>       |               |
|                                                           |                                                      | Non-elective   | 93.0% [n=40]        | 97.9% [n=46]        | 0.3451              | 93.3% [n=42]        | 98.0% [n=50]        | 0.3379              |               |
|                                                           |                                                      | Elective       | 90.3% [n=28]        | 83.3% [n=20]        | 0.6862              | 88.6% [n=31]        | 86.2% [n=25]        | 0.9999              |               |
|                                                           | Radial artery, %                                     | <b>Overall</b> | <b>12.2% [n=9]</b>  | <b>7.0% [n=5]</b>   | <b>0.4014</b>       | <b>11.3% [n=9]</b>  | <b>7.5% [n=6]</b>   | <b>0.5889</b>       |               |
|                                                           |                                                      | Non-elective   | 16.3% [n=7]         | 8.5% [n=4]          | 0.3402              | 15.6% [n=7]         | 7.8% [n=4]          | 0.3379              |               |
|                                                           |                                                      | Elective       | 6.5% [n=2]          | 4.2% [n=1]          | 0.9999              | 5.7% [n=2]          | 6.9% [n=2]          | 0.9999              |               |
|                                                           | CABG performed with additional surgical procedure, % |                | <b>Overall</b>      | <b>25.7% [n=19]</b> | <b>28.2% [n=20]</b> | <b>0.8517</b>       | <b>26.3% [n=21]</b> | <b>28.8% [n=23]</b> | <b>0.8596</b> |
|                                                           |                                                      |                | Non-elective        | 9.5% [n=7]          | 14.1% [n=10]        | 0.5988              | 8.8% [n=7]          | 13.8% [n=11]        | 0.6015        |
|                                                           |                                                      |                | Elective            | 16.2% [n=12]        | 14.1% [n=10]        | 0.9999              | 17.5% [n=14]        | 15.0% [n=12]        | 0.9999        |
| Additional surgical procedures                            | Aortic valve replacement, %                          | <b>Overall</b> | <b>12.2% [n=9]</b>  | <b>19.7% [n=14]</b> | <b>0.2586</b>       | <b>12.5% [n=10]</b> | <b>18.8% [n=15]</b> | <b>0.3841</b>       |               |
|                                                           |                                                      | Non-elective   | 9.3% [n=4]          | 12.8% [n=6]         | 0.7419              | 8.9% [n=4]          | 11.8% [n=6]         | 0.7456              |               |
|                                                           |                                                      | Elective       | 16.1% [n=5]         | 33.3% [n=8]         | 0.2018              | 17.1% [n=6]         | 31.0% [n=9]         | 0.2419              |               |
|                                                           | Mitral valve replacement, %                          | <b>Overall</b> | <b>2.7% [n=2]</b>   | <b>1.4% [n=1]</b>   | <b>0.9999</b>       | <b>3.8% [n=3]</b>   | <b>2.5% [n=2]</b>   | <b>0.9999</b>       |               |
|                                                           |                                                      | Non-elective   | 0.0% [n=0]          | 2.1% [n=1]          | 0.9999              | 0.0% [n=0]          | 3.9% [n=2]          | 0.4967              |               |
|                                                           |                                                      | Elective       | 6.5% [n=2]          | 0.0% [n=0]          | 0.4990              | 8.6% [n=3]          | 0.0% [n=0]          | 0.2448              |               |
|                                                           | Mitral valve repair, %                               | <b>Overall</b> | <b>5.4% [n=4]</b>   | <b>1.4% [n=1]</b>   | <b>0.3668</b>       | <b>5.0% [n=4]</b>   | <b>1.3% [n=1]</b>   | <b>0.3671</b>       |               |
|                                                           |                                                      | Non-elective   | 2.3% [n=1]          | 0.0% [n=0]          | 0.4778              | 2.2% [n=1]          | 0.0% [n=0]          | 0.4688              |               |
|                                                           |                                                      | Elective       | 9.8% [n=3]          | 4.2% [n=1]          | 0.6237              | 8.6% [n=3]          | 3.4% [n=1]          | 0.6198              |               |
|                                                           | Maze, %                                              | <b>Overall</b> | <b>6.8% [n=5]</b>   | <b>2.8% [n=2]</b>   | <b>0.4422</b>       | <b>6.3% [n=5]</b>   | <b>2.5% [n=2]</b>   | <b>0.4426</b>       |               |
|                                                           |                                                      | Non-elective   | 2.3% [n=1]          | 2.1% [n=1]          | 0.9999              | 2.2% [n=1]          | 2.0% [n=1]          | 0.9999              |               |
|                                                           |                                                      | Elective       | 12.9% [n=4]         | 4.2% [n=1]          | 0.3728              | 11.4% [n=4]         | 3.4% [n=1]          | 0.3663              |               |

|              |                |                   |                     |                                                            |                |                     |                     |                     |                     |                   |                     |                     |               |
|--------------|----------------|-------------------|---------------------|------------------------------------------------------------|----------------|---------------------|---------------------|---------------------|---------------------|-------------------|---------------------|---------------------|---------------|
|              |                |                   |                     | Left atrial appendage closure, %                           | <b>Overall</b> | <b>6.8% [n=5]</b>   | <b>2.8% [n=2]</b>   | <b>0.4422</b>       | <b>6.3% [n=5]</b>   | <b>2.5% [n=2]</b> | 0.4426              |                     |               |
|              |                |                   |                     | Non-elective                                               | 4.7% [n=2]     | 2.1% [n=1]          | 0.6043              | 4.4% [n=2]          | 2.0% [n=1]          | 0.5984            |                     |                     |               |
|              |                |                   |                     | Elective                                                   | 9.7% [n=3]     | 4.2% [n=1]          | 0.6237              | 8.6% [n=3]          | 3.4% [n=1]          | 0.6198            |                     |                     |               |
|              |                |                   |                     | Coronary endarterectomy, %                                 | <b>Overall</b> | <b>0.0% [n=0]</b>   | <b>4.2% [n=3]</b>   | <b>0.1149</b>       | <b>0.0% [n=0]</b>   | <b>5.0% [n=4]</b> | <b>0.1203</b>       |                     |               |
|              |                |                   |                     | Non-elective                                               | 0.0% [n=0]     | 4.3% [n=2]          | 0.4954              | 0.0% [n=0]          | 3.9% [n=2]          | 0.4967            |                     |                     |               |
|              |                |                   |                     | Elective                                                   | 0.0% [n=0]     | 4.2% [n=1]          | 0.4364              | 0.0% [n=0]          | 7.0% [n=2]          | 0.2168            |                     |                     |               |
|              |                |                   |                     | Insertion of intra-aortic balloon pump, %                  | <b>Overall</b> | <b>2.7% [n=2]</b>   | <b>1.4% [n=1]</b>   | <b>0.9999</b>       | <b>2.5% [n=2]</b>   | <b>1.3% [n=1]</b> | <b>0.9999</b>       |                     |               |
|              |                |                   |                     | Non-elective                                               | 4.7% [n=2]     | 2.1% [n=1]          | 0.6043              | 4.4% [n=2]          | 2.0% [n=1]          | 0.6022            |                     |                     |               |
|              |                |                   |                     | Elective                                                   | 0.0% [n=0]     | 0.0% [n=0]          | 0.9999              | 0.0% [n=0]          | 0.0% [n=0]          | 0.9999            |                     |                     |               |
|              |                |                   |                     | Carotid endarterectomy, %                                  | <b>Overall</b> | <b>1.4% [n=1]</b>   | <b>0.0% [n=0]</b>   | <b>0.9999</b>       | <b>1.3% [n=1]</b>   | <b>1.3% [n=1]</b> | <b>0.9999</b>       |                     |               |
|              |                |                   |                     | Non-elective                                               | 2.3% [n=1]     | 0.0% [n=0]          | 0.4778              | 2.2% [n=1]          | 2.0% [n=1]          | 0.9999            |                     |                     |               |
|              |                |                   |                     | Elective                                                   | 0.0% [n=0]     | 0.0% [n=0]          | 0.9999              | 0.0% [n=0]          | 0.0% [n=0]          | 0.9999            |                     |                     |               |
|              |                |                   |                     | Septal myectomy, %                                         | <b>Overall</b> | <b>1.4% [n=1]</b>   | <b>0.0% [n=0]</b>   | <b>0.9999</b>       | <b>1.3% [n=1]</b>   | <b>0.0% [n=0]</b> | <b>0.9999</b>       |                     |               |
|              |                |                   |                     | Non-elective                                               | 0.0% [n=0]     | 0.0% [n=0]          | 0.9999              | 0.0% [n=0]          | 0.0% [n=0]          | 0.9999            |                     |                     |               |
|              |                |                   |                     | Elective                                                   | 3.2% [n=1]     | 0.0% [n=0]          | 0.9999              | 2.9% [n=1]          | 0.0% [n=0]          | 0.9999            |                     |                     |               |
|              |                |                   |                     | Ligation of coronary artery to pulmonary artery fistula, % | <b>Overall</b> | <b>1.4% [n=1]</b>   | <b>0.0% [n=0]</b>   | <b>0.9999</b>       | <b>1.3% [n=1]</b>   | <b>0.0% [n=0]</b> | <b>0.9999</b>       |                     |               |
|              |                |                   |                     | Non-elective                                               | 0.0% [n=0]     | 0.0% [n=0]          | 0.9999              | 0.0% [n=0]          | 0.0% [n=0]          | 0.9999            |                     |                     |               |
|              |                |                   |                     | Elective                                                   | 3.2% [n=1]     | 0.0% [n=0]          | 0.9999              | 2.9% [n=1]          | 0.0% [n=0]          | 0.9999            |                     |                     |               |
|              |                |                   |                     | Lung lobectomy, %                                          | <b>Overall</b> | <b>0.0% [n=0]</b>   | <b>0.0% [n=0]</b>   | <b>0.9999</b>       | <b>1.3% [n=1]</b>   | <b>0.0% [n=0]</b> | <b>0.9999</b>       |                     |               |
|              |                |                   |                     | Non-elective                                               | 0.0% [n=0]     | 0.0% [n=0]          | 0.9999              | 0.0% [n=0]          | 0.0% [n=0]          | 0.9999            |                     |                     |               |
|              |                |                   |                     | Elective                                                   | 0.0% [n=0]     | 0.0% [n=0]          | 0.9999              | 2.9% [n=1]          | 0.0% [n=0]          | 0.9999            |                     |                     |               |
|              |                |                   |                     | Redo sternotomy, %                                         | <b>Overall</b> | <b>2.7% [n=2]</b>   | <b>1.4% [n=1]</b>   | <b>0.9999</b>       | <b>2.5% [n=2]</b>   | <b>1.3% [n=1]</b> | <b>0.9999</b>       |                     |               |
|              |                |                   |                     | Non-elective                                               | 4.7% [n=2]     | 2.1% [n=1]          | 0.6043              | 4.4% [n=2]          | 2.0% [n=1]          | 0.6017            |                     |                     |               |
|              |                |                   |                     | Elective                                                   | 0.0% [n=0]     | 0.0% [n=0]          | 0.9999              | 0.0% [n=0]          | 0.0% [n=0]          | 0.9999            |                     |                     |               |
|              |                |                   |                     | Chest tube size, Fr, %                                     | Mediastinal    | 32                  | <b>Overall</b>      | <b>95.9% [n=71]</b> | <b>87.3% [n=62]</b> | 0.0742            | 96.3% [n=77]        | <b>88.8% [n=71]</b> | <b>0.1307</b> |
|              |                |                   |                     |                                                            |                |                     | Non-elective        | 93.0% [n=40]        | 89.4% [n=42]        | 0.7160            | 93.3% [n=42]        | 90.2% [n=46]        | 0.7192        |
|              |                |                   |                     |                                                            |                |                     | Elective            | 100.0% [n=31]       | 83.3% [n=20]        | 0.0312            | 100.0% [n=35]       | 86.2% [n=25]        | 0.0374        |
|              |                |                   |                     |                                                            |                | 28                  | <b>Overall</b>      | <b>50.0% [n=37]</b> | <b>45.1% [n=32]</b> | <b>0.6189</b>     | <b>50.0% [n=40]</b> | <b>46.3% [n=37]</b> | <b>0.7518</b> |
| Non-elective | 58.1% [n=25]   | 40.4% [n=19]      | 0.1391              |                                                            |                |                     | 60.0% [n=27]        | 39.2% [n=20]        | 0.0651              |                   |                     |                     |               |
| Elective     | 38.7% [n=12]   | 54.2% [n=13]      | 0.2864              |                                                            |                |                     | 37.1% [n=13]        | 58.6% [n=17]        | 0.1309              |                   |                     |                     |               |
| 24           | <b>Overall</b> | <b>1.4% [n=1]</b> | <b>1.4% [n=1]</b>   |                                                            |                | <b>0.9999</b>       | <b>1.3% [n=1]</b>   | <b>2.5% [n=2]</b>   | <b>0.9999</b>       |                   |                     |                     |               |
|              | Non-elective   | 2.3% [n=1]        | 2.1% [n=1]          |                                                            |                | 0.9999              | 2.2% [n=1]          | 2.0% [n=1]          | 0.9999              |                   |                     |                     |               |
|              | Elective       | 0.0% [n=0]        | 0.0% [n=0]          |                                                            |                | 0.9999              | 0.0% [n=0]          | 3.4% [n=1]          | 0.4531              |                   |                     |                     |               |
| 19           | <b>Overall</b> | <b>1.4% [n=1]</b> | <b>2.8% [n=2]</b>   |                                                            |                | <b>0.6146</b>       | <b>1.3% [n=1]</b>   | <b>3.8% [n=3]</b>   | <b>0.6202</b>       |                   |                     |                     |               |
|              | Non-elective   | 0.0% [n=0]        | 2.1% [n=1]          |                                                            |                | 0.9999              | 0.0% [n=0]          | 3.9% [n=2]          | 0.4967              |                   |                     |                     |               |
|              | Elective       | 3.2% [n=1]        | 4.2% [n=1]          |                                                            |                | 0.9999              | 2.9% [n=1]          | 3.4% [n=1]          | 0.9999              |                   |                     |                     |               |
| Pleural      | 28             | <b>Overall</b>    | <b>43.2% [n=32]</b> | <b>43.7% [n=31]</b>                                        | <b>0.9999</b>  | <b>43.8% [n=35]</b> | <b>43.8% [n=35]</b> | <b>0.9999</b>       |                     |                   |                     |                     |               |

|                              |                                                         |                |                      |                      |                        |                         |                      |                        |                          |               |
|------------------------------|---------------------------------------------------------|----------------|----------------------|----------------------|------------------------|-------------------------|----------------------|------------------------|--------------------------|---------------|
|                              |                                                         |                | 24                   | Non-elective         | 41.9% [n=18]           | 46.8% [n=22]            | 0.6756               | 40.0% [n=18]           | 49.0% [n=25]             | 0.4156        |
|                              |                                                         |                |                      | Elective             | 45.2% [n=14]           | 37.5% [n=9]             | 0.5945               | 48.6% [n=17]           | 34.5% [n=10]             | 0.3138        |
|                              |                                                         |                |                      | <b>Overall</b>       | <b>50.0% [n=37]</b>    | <b>53.5% [n=38]</b>     | <b>0.7404</b>        | <b>48.8% [n=39]</b>    | <b>52.5% [n=42]</b>      | <b>0.7519</b> |
|                              |                                                         |                |                      | Non-elective         | 55.8% [n=24]           | 53.2% [n=25]            | 0.8349               | 57.8% [n=26]           | 51.0% [n=26]             | 0.5432        |
|                              |                                                         |                |                      | Elective             | 41.9% [n=13]           | 54.2% [n=13]            | 0.4224               | 37.1% [n=13]           | 55.2% [n=16]             | 0.2081        |
|                              |                                                         |                |                      | <b>Overall</b>       | <b>1.4% [n=1]</b>      | <b>1.4% [n=1]</b>       | <b>0.9999</b>        | <b>1.3% [n=1]</b>      | <b>1.3% [n=1]</b>        | <b>0.9999</b> |
|                              |                                                         |                | 19                   | Non-elective         | 0.0% [n=0]             | 2.1% [n=1]              | 0.9999               | 0.0% [n=0]             | 2.0% [n=1]               | 0.9999        |
|                              |                                                         |                |                      | Elective             | 3.2% [n=1]             | 0.0% [n=0]              | 0.9999               | 2.9% [n=1]             | 0.0% [n=0]               | 0.9999        |
|                              |                                                         |                |                      | <b>Overall</b>       | <b>24.2 (7.5-40.9)</b> | <b>16.9 (14.3-19.5)</b> | <b>0.2165</b>        | <b>23.5 (8.1-39.0)</b> | <b>18.5 (14.6-22.40)</b> | <b>0.1293</b> |
|                              |                                                         |                |                      | Non-elective         | 31.7 (2.9-60.5)        | 16.8 (13.6-20.0)        | 0.2813               | 31.0 (3.5-58.4)        | 16.7 (13.7-19.7)         | 0.2716        |
| <b>Postoperative factors</b> | Duration of mechanical ventilation, hours, mean (95%CI) | Elective       | 13.8 (9.3-18.3)      | 17.0 (12.2-21.8)     | 0.3218                 | 14.0 (9.9-18.1)         | 21.6 (11.9-31.3)     | 0.1238                 |                          |               |
|                              |                                                         | <b>Overall</b> | <b>48.7% [n=36]</b>  | <b>45.1% [n=32]</b>  | <b>0.7399</b>          | <b>48.8% [n=39]</b>     | <b>47.5% [n=38]</b>  | <b>0.9999</b>          |                          |               |
|                              |                                                         | Non-elective   | 32.4% [n=24]         | 32.4% [n=23]         | 0.5341                 | 31.3% [n=25]            | 33.8% [n=27]         | 0.8394                 |                          |               |
|                              | Presence of NGT or OGT, %                               | Elective       | 16.2% [n=12]         | 12.7% [n=9]          | 0.9999                 | 17.5% [n=14]            | 13.8% [n=11]         | 0.9999                 |                          |               |
|                              |                                                         | <b>Overall</b> | <b>4.3 (3.6-5.0)</b> | <b>3.9 (3.4-4.4)</b> | <b>0.3799</b>          | <b>4.3 (3.7-4.9)</b>    | <b>3.9 (3.4-4.3)</b> | <b>0.2736</b>          |                          |               |
|                              |                                                         | Non-elective   | 4.7 (3.8-5.7)        | 3.8 (3.2-4.4)        | 0.1167                 | 4.8 (3.9-5.7)           | 3.8 (3.2-4.4)        | 0.0830                 |                          |               |
|                              | Duration with ≥1 chest tube, days, mean (95%CI)         | Elective       | 3.7 (2.8-4.6)        | 4.1 (3.2-5.1)        | 0.5727                 | 3.7 (2.9-4.5)           | 3.9 (3.1-4.7)        | 0.7157                 |                          |               |

**Table S4.** Subject motivational factors

| Motivational factor              |                | Per-protocol                  |                                   |               | Intent-to-treat               |                                   |               |
|----------------------------------|----------------|-------------------------------|-----------------------------------|---------------|-------------------------------|-----------------------------------|---------------|
|                                  |                | Control Bell OFF mean (95%CI) | Experimental Bell ON mean (95%CI) | P value       | Control Bell OFF mean (95%CI) | Experimental Bell ON mean (95%CI) | P value       |
| <b>Self-efficacy</b>             | <b>Overall</b> | <b>4.4 (4.2-4.6)</b>          | <b>4.4 (4.2-4.6)</b>              | <b>0.9285</b> | <b>4.4 (4.2-4.6)</b>          | <b>4.4 (4.2-4.6)</b>              | <b>0.9285</b> |
|                                  | Non-elective   | 4.5 (4.2-4.7)                 | 4.4 (4.2-4.6)                     | 0.5485        | 4.5 (4.3-4.7)                 | 4.5 (4.2-4.6)                     | 0.7501        |
|                                  | Elective       | 4.3 (4.0-4.6)                 | 4.4 (4.1-4.7)                     | 0.5485        | 4.3 (4.0-4.5)                 | 4.4 (4.0-4.6)                     | 0.7501        |
| <b>Effort attribution</b>        | <b>Overall</b> | <b>4.5 (4.4-4.7)</b>          | <b>4.6 (4.4-4.7)</b>              | <b>0.4971</b> | <b>4.5 (4.4-4.7)</b>          | <b>4.6 (4.5-4.7)</b>              | <b>0.3801</b> |
|                                  | Non-elective   | 4.5 (4.3-4.7)                 | 4.6 (4.4-4.7)                     | 0.9327        | 4.6 (4.3-4.7)                 | 4.6 (4.4-4.8)                     | 0.8372        |
|                                  | Elective       | 4.5 (4.2-4.7)                 | 4.6 (4.3-4.8)                     | 0.9327        | 4.5 (4.2-4.7)                 | 4.6 (4.3-4.8)                     | 0.8372        |
| <b>Implicit theory of change</b> | <b>Overall</b> | <b>2.1 (1.8-2.3)</b>          | <b>2.1 (1.9-2.4)</b>              | <b>0.7731</b> | <b>2.0 (1.8-2.3)</b>          | <b>2.1 (1.9-2.4)</b>              | <b>0.6159</b> |
|                                  | Non-elective   | 2.1 (1.8-2.4)                 | 2.3 (1.9-2.6)                     | 0.3532        | 2.0 (1.7-2.3)                 | 2.1 (1.8-2.4)                     | 0.9290        |
|                                  | Elective       | 2.1 (1.7-2.5)                 | 1.9 (1.5-2.4)                     | 0.3532        | 2.0 (1.7-2.4)                 | 2.1 (1.7-2.6)                     | 0.9290        |
| <b>Locus of control</b>          | <b>Overall</b> | <b>4.4 (4.2-4.6)</b>          | <b>4.3 (4.1-4.5)</b>              | <b>0.2959</b> | <b>4.4 (4.3-4.6)</b>          | <b>4.3 (4.1-4.4)</b>              | <b>0.1194</b> |
|                                  | Non-elective   | 4.4 (4.2-4.6)                 | 4.3 (4.1-4.5)                     | 0.5858        | 4.4 (4.2-4.6)                 | 4.1 (3.7-4.4)                     | 0.3882        |
|                                  | Elective       | 4.5 (4.2-4.7)                 | 4.3 (3.9-4.5)                     | 0.5858        | 4.4 (4.2-4.6)                 | 4.3 (4.1-4.5)                     | 0.3882        |

**Table S5.** Mean daily IS inspiratory volumes

|                                  |                | Per-protocol                         |                                          |               | Intent-to-treat                      |                                          |               |
|----------------------------------|----------------|--------------------------------------|------------------------------------------|---------------|--------------------------------------|------------------------------------------|---------------|
|                                  |                | Control<br>Bell OFF<br>Mean (95% CI) | Experimental<br>Bell ON<br>Mean (95% CI) | P<br>value    | Control<br>Bell OFF<br>Mean (95% CI) | Experimental<br>Bell ON<br>Mean (95% CI) | P<br>value    |
| IS<br>inspiratory<br>volumes, mL | <b>Overall</b> | <b>976.8 (873.5-1080.1)</b>          | <b>1022.9 (909.9-1135.9)</b>             | <b>0.5525</b> | <b>974.1 (875.6-1072.5)</b>          | <b>1007.8 (903.1-1112.5)</b>             | <b>0.6429</b> |
|                                  | Non-elective   | 1008.2 (865.74-1150.6)               | 981.7 (839.3-1124.0)                     | 0.5615        | 998.4 (860.0-1136.9)                 | 945.3 (811.2-1079.5)                     | 0.9569        |
|                                  | Elective       | 948.3 (804.8-1091.8)                 | 1065.1 (887.9-1242.2)                    | 0.5615        | 970.4 (836.2-1104.7)                 | 1031.4 (870.4-1192.5)                    | 0.9569        |

**Table S6.** Rate of change of pulmonary function tests

| Rate of change to preoperative baseline |                 | Measurement                                                                                                                                                                                                                                                                                                                          | Per-protocol                   |                                    |         | Intent-to-treat                |                                    |         |
|-----------------------------------------|-----------------|--------------------------------------------------------------------------------------------------------------------------------------------------------------------------------------------------------------------------------------------------------------------------------------------------------------------------------------|--------------------------------|------------------------------------|---------|--------------------------------|------------------------------------|---------|
|                                         |                 |                                                                                                                                                                                                                                                                                                                                      | Control Bell OFF Rate (95% CI) | Experimental Bell ON Rate (95% CI) | P value | Control Bell OFF Rate (95% CI) | Experimental Bell ON Rate (95% CI) | P value |
| FEV1                                    | L/day           | Measured each postoperative morning with three patient attempts using a handheld spirometer (Micro1, CareFusion, San Diego, CA) with automatically calculated NHANES III <sup>27</sup> predicted values (based on age, sex, race, height) and compared to pre-operative baseline values measured using the same handheld spirometer. | 0.1 (0.0-0.1)                  | 0.1 (0.1-0.1)                      | 0.2565  | 0.1 (0.0-0.1)                  | 0.1 (0.1-0.1)                      | 0.3443  |
|                                         | % predicted/day |                                                                                                                                                                                                                                                                                                                                      | 2.2 (1.8-2.7)                  | 2.7 (2.1-3.2)                      | 0.2080  | 2.0 (1.4-2.6)                  | 2.4 (1.8-3.1)                      | 0.3829  |
| FVC                                     | L/day           |                                                                                                                                                                                                                                                                                                                                      | 0.1 (0.1-0.1)                  | 0.1 (0.1-0.1)                      | 0.1943  | 0.1 (0.1-0.1)                  | 0.1 (0.1-0.1)                      | 0.4809  |
|                                         | % predicted/day |                                                                                                                                                                                                                                                                                                                                      | 2.3 (1.8-2.7)                  | 2.6 (2.1-3.2)                      | 0.2673  | 2.0 (1.4-2.7)                  | 2.4 (1.8-3.0)                      | 0.4620  |
| FEV1/FVC                                | %/day           |                                                                                                                                                                                                                                                                                                                                      | -0.7 (-1.2 - -0.2)             | -0.7 (-1.1 - -0.3)                 | 0.9720  | -0.7 (-1.1 - -0.2)             | -0.6 (-1.0 - -0.2)                 | 0.9571  |
|                                         | % predicted/day |                                                                                                                                                                                                                                                                                                                                      | -0.7 (-1.4 - -0.0)             | -1.4 (-2.0 - -0.8)                 | 0.1384  | -0.7 (-1.4 - -0.1)             | -0.7 (-2.1-0.7)                    | 0.9581  |
| PEF                                     | L/s/day         |                                                                                                                                                                                                                                                                                                                                      | 0.1 (0.1-0.2)                  | 0.2 (0.1-0.2)                      | 0.2416  | 0.1 (0.1-0.2)                  | 0.1 (0.1-0.2)                      | 0.9605  |
|                                         | % predicted/day |                                                                                                                                                                                                                                                                                                                                      | 1.8 (1.2-2.3)                  | 2.1 (1.5-2.7)                      | 0.4106  | 1.7 (1.0-2.3)                  | 1.7 (0.8-2.6)                      | 0.9436  |

FEV1 = Forced expiratory volume in the first second; FVC = Forced vital capacity; PEF = Peak expiratory flow.

**Table S7.** High-flow nasal cannula and non-rebreather mask use duration

|                                   |                | Per-protocol                        |                                         |               | Intent-to-treat                     |                                         |               |
|-----------------------------------|----------------|-------------------------------------|-----------------------------------------|---------------|-------------------------------------|-----------------------------------------|---------------|
|                                   |                | Control<br>Bell OFF<br>Mean (95%CI) | Experimental<br>Bell ON<br>Mean (95%CI) | P value       | Control<br>Bell OFF<br>Mean (95%CI) | Experimental<br>Bell ON<br>Mean (95%CI) | P value       |
| High-flow nasal<br>cannula, hours | <b>Overall</b> | <b>20.0 (11.6-28.5)</b>             | <b>13.8 (6.6-21.1)</b>                  | <b>0.1387</b> | <b>19.9 (11.8-27.9)</b>             | <b>12.3 (5.8-18.8)</b>                  | <b>0.0771</b> |
|                                   | Non-elective   | 23.4 (10.4-36.3)                    | 11.1 (4.0-18.1)                         | 0.0495        | 24.2 (11.5-36.9)                    | 10.2 (3.6-16.8)                         | 0.0251        |
|                                   | Elective       | 15.4 (6.4-24.4)                     | 19.2 (2.8-35.6)                         | 0.3374        | 14.3 (6.1-22.4)                     | 16.1 (2.3-29.8)                         | 0.4101        |
| Non-rebreather<br>mask, hours     | <b>Overall</b> | <b>0.2 (0.0-0.6)</b>                | <b>0.0 (0.0-0.1)</b>                    | <b>0.1416</b> | <b>0.1 (0.0-0.3)</b>                | <b>0.1 (0.0-0.2)</b>                    | <b>0.3998</b> |
|                                   | Non-elective   | 0.2 (0.0-0.6)                       | 0.0 (0.0-0.1)                           | 0.2831        | 0.2 (0.0-0.6)                       | 0.0 (0.0-0.1)                           | 0.2844        |
|                                   | Elective       | 0.0 (0.0-0.0)                       | 0.2 (0.0-0.3)                           | 0.1279        | 0.0 (0.0-0.0)                       | 0.2 (0.0-0.4)                           | 0.0706        |

**Table S8.** Noninvasive positive pressure ventilation use duration

| Duration, hours, mean<br>(95%CI) |                | Per-protocol                        |                                         |               | Intent-to-treat                     |                                     |               |
|----------------------------------|----------------|-------------------------------------|-----------------------------------------|---------------|-------------------------------------|-------------------------------------|---------------|
|                                  |                | Control<br>Bell OFF<br>Mean (95%CI) | Experimental<br>Bell ON<br>Mean (95%CI) | P value       | Control<br>Bell OFF<br>Mean (95%CI) | Control<br>Bell OFF<br>Mean (95%CI) | P value       |
|                                  | <b>Overall</b> | <b>8.7 (3.8-19.5)</b>               | <b>5.1 (2.2-11.8)</b>                   | <b>0.1856</b> | <b>8.7 (3.9-19.2)</b>               | <b>5.9 (2.7-13.0)</b>               | <b>0.2445</b> |
|                                  | Non-elective   | 9.7 (3.4-27.8)                      | 3.1 (1.1-8.5)                           | 0.0619        | 10.5 (3.7-29.6)                     | 3.3 (1.2-8.9)                       | 0.0570        |
|                                  | Elective       | 7.2 (2.1-25.0)                      | 9.1 (2.2-37.1)                          | 0.4055        | 6.4 (2.0-20.8)                      | 10.3 (2.8-37.7)                     | 0.2944        |

**Table S9.** Reintubation and tracheostomy

|                     |                |                               | Per-protocol            |                        |               | Intent-to-treat         |                         |               |
|---------------------|----------------|-------------------------------|-------------------------|------------------------|---------------|-------------------------|-------------------------|---------------|
|                     |                |                               | Control Bell OFF        | Experimental Bell ON   | P value       | Control Bell OFF        | Experimental Bell ON    | P value       |
| <b>Reintubation</b> | <b>Overall</b> | Rate, % (95%CI)               | <b>12.2% (5.5-26.9)</b> | <b>8.5% (3.3-21.3)</b> | <b>0.2781</b> | <b>13.8% (7.0-27.0)</b> | <b>10.0% (4.7-21.5)</b> | <b>0.2691</b> |
|                     |                | Duration, hours, mean (95%CI) | <b>7.9 (1.2-54.3)</b>   | <b>5.7 (0.8-40.4)</b>  | <b>0.4048</b> | <b>10.5 (2.0-56.1)</b>  | <b>6.7 (1.3-35.6)</b>   | <b>0.3519</b> |
|                     | Non-elective   | Rate, % (95%CI)               | 16.3% (6.5-40.1)        | 6.4% (1.8-22.3)        | 0.1178        | 17.8% (8.1-39.2)        | 5.9% (1.8-19.4)         | 0.0643        |
|                     |                | Duration, hours, mean (95%CI) | 9.6 (0.8-112.8)         | 1.9 (0.2-19.8)         | 0.1712        | 14.1 (1.6-121.6)        | 1.7 (0.2-13.1)          | 0.0809        |
|                     | Elective       | Rate, % (95%CI)               | 6.5% (1.4-29.9)         | 12.5% (3.2-48.2)       | 0.26165       | 8.6% (2.5-28.9)         | 17.2% (6.4-46.7)        | 0.1904        |
|                     |                | Duration, hours, mean (95%CI) | 5.6 (0.3-100.7)         | 13.1 (0.5-352.4)       | 0.3495        | 5.9 (0.5-67.9)          | 15.4 (1.1-224.6)        | 0.3013        |
| <b>Tracheostomy</b> | <b>Overall</b> | Rate, % (95%CI)               | <b>0.0% (0.0-0.0)</b>   | <b>0.0% (0.0-0.0)</b>  | <b>0.9999</b> | <b>0.0% (0.0-0.0)</b>   | <b>0.0% (0.0-0.0)</b>   | <b>0.9999</b> |

**Table S10.** Postoperative pulmonary complication rates

| Complication             | Measurement                                                                                                                                                                                                                                         |                         | Per-protocol      |                      |               | Intent-to-treat   |                      |               |
|--------------------------|-----------------------------------------------------------------------------------------------------------------------------------------------------------------------------------------------------------------------------------------------------|-------------------------|-------------------|----------------------|---------------|-------------------|----------------------|---------------|
|                          |                                                                                                                                                                                                                                                     |                         | Control Bell OFF  | Experimental Bell ON | P value       | Control Bell OFF  | Experimental Bell ON | P value       |
| Pneumonia                | Physician-diagnosed and treated, with (+) sputum culture, rate, % (n)                                                                                                                                                                               | <b>Overall</b>          | <b>5.4% (4)</b>   | <b>1.4% (1)</b>      | <b>0.1834</b> | <b>6.3% (5)</b>   | <b>1.3% (1)</b>      | <b>0.1049</b> |
|                          |                                                                                                                                                                                                                                                     | Non-elective            | 7.0% (3)          | 2.1% (1)             | 0.2753        | 8.9% (4)          | 2.0% (1)             | 0.1443        |
|                          |                                                                                                                                                                                                                                                     | Elective                | 3.2% (1)          | 0.0% (0)             | 0.5636        | 2.9% (1)          | 0.0% (0)             | 0.5469        |
| Pneumothorax             | Radiologist reported, on any postoperative CXR, rate, % (n)                                                                                                                                                                                         | <b>Overall</b>          | <b>20.3% (15)</b> | <b>22.5% (16)</b>    | <b>0.4481</b> | <b>21.3% (17)</b> | <b>21.3% (17)</b>    | <b>0.5765</b> |
|                          |                                                                                                                                                                                                                                                     | Non-elective            | 23.3% (10)        | 25.5% (12)           | 0.4986        | 24.4% (11)        | 25.5% (13)           | 0.5479        |
|                          |                                                                                                                                                                                                                                                     | Elective                | 16.1% (5)         | 16.7% (4)            | 0.6185        | 17.1% (6)         | 13.8% (4)            | 0.4945        |
| Pleural effusion         | Radiologist reported effusion > "small", on any postoperative CXR, rate, % (n)                                                                                                                                                                      | <b>Overall</b>          | <b>8.1% (6)</b>   | <b>9.9% (7)</b>      | <b>0.4683</b> | <b>7.5% (6)</b>   | <b>8.8% (7)</b>      | <b>0.5000</b> |
|                          |                                                                                                                                                                                                                                                     | Non-elective            | 9.3% (4)          | 10.6% (5)            | 0.5572        | 9.9% (4)          | 9.8% (5)             | 0.5799        |
|                          |                                                                                                                                                                                                                                                     | Elective                | 6.5% (2)          | 8.3% (2)             | 0.5914        | 5.7% (2)          | 6.9% (2)             | 0.6189        |
| Bronchospasm             | Administration of bronchodilator (albuterol, levalbuterol, ipratropium, or ipratropium-albuterol), rate, % (n)                                                                                                                                      | <b>Overall</b>          | <b>5.4% (4)</b>   | <b>12.7% (9)</b>     | <b>0.1069</b> | <b>5.0% (4)</b>   | <b>11.3% (9)</b>     | <b>0.1233</b> |
|                          |                                                                                                                                                                                                                                                     | Non-elective            | 9.35 (4)          | 12.8% (6)            | 0.4281        | 9.1% (4)          | 11.5% (6)            | 0.4810        |
|                          |                                                                                                                                                                                                                                                     | Elective                | 0.0% (0)          | 12.5% (3)            | 0.0771        | 0.0% (0)          | 10.3%                | 0.0877        |
| Pulmonary embolism       | Diagnosed by CT chest, any postoperative day, rate, % (n)                                                                                                                                                                                           | <b>Overall</b>          | <b>1.4% (1)</b>   | <b>0.0% (0)</b>      | <b>0.5103</b> | <b>2.5% (2)</b>   | <b>0.0% (0)</b>      | <b>0.2484</b> |
|                          |                                                                                                                                                                                                                                                     | Non-elective            | 2.3% (1)          | 0.0% (0)             | 0.4778        | 4.4% (2)          | 0.0% (0)             | 0.2171        |
|                          |                                                                                                                                                                                                                                                     | Elective                | 0.0% (0)          | 0.0% (0)             | 0.9999        | 0.0% (0)          | 0.0% (0)             | 0.9999        |
| Pulmonary edema severity | CXR severity scores (graded 0-3) <sup>19</sup> between First postoperative CXR off positive airway pressure (extubated, noninvasive positive pressure ventilation) and Final CXR before discharge. Scored by two experienced thoracic radiologists. | First CXR, mean (95%CI) | 0.7 (0.6-1.0)     | 0.7 (0.6-1.0)        | 0.9748        | 0.8 (0.6-1.0)     | 0.8 (0.6-1.0)        | 0.9109        |
|                          |                                                                                                                                                                                                                                                     | Final CXR, mean (95%CI) | 0.3 (0.2-0.4)     | 0.3 (0.2-0.4)        | 0.9939        | 0.3 (0.2-0.4)     | 0.3 (0.2-0.4)        | 0.7970        |

**Table S11.** Discharge location

| Discharge Location |                | Per-protocol                 |                                  |               | Intent-to-treat              |                                  |               |
|--------------------|----------------|------------------------------|----------------------------------|---------------|------------------------------|----------------------------------|---------------|
|                    |                | Control Bell OFF Rate, % (n) | Experimental Bell ON Rate, % (n) | P value       | Control Bell OFF Rate, % (n) | Experimental Bell ON Rate, % (n) | P value       |
| Home               | <b>Overall</b> | <b>60.8% (45)</b>            | <b>59.2% (42)</b>                | <b>0.4864</b> | <b>58.8% (47)</b>            | <b>60.0% (48)</b>                | <b>0.5000</b> |
|                    | Non-elective   | 55.8% (24)                   | 61.7% (29)                       | 0.3621        | 43.6% (24)                   | 60.8% (31)                       | 0.2981        |
|                    | Elective       | 67.7% (21)                   | 54.2% (13)                       | 0.2271        | 65.7% (23)                   | 58.6% (17)                       | 0.3724        |
| Nursing facility*  | <b>Overall</b> | <b>35.1% (26)</b>            | <b>39.4% (28)</b>                | <b>0.3580</b> | <b>36.3% (29)</b>            | <b>37.5% (30)</b>                | <b>0.5000</b> |
|                    | Non-elective   | 37.2% (16)                   | 38.3% (18)                       | 0.5445        | 40.0% (18)                   | 37.3% (19)                       | 0.4734        |
|                    | Elective       | 32.3% (10)                   | 41.7% (10)                       | 0.3305        | 31.4% (11)                   | 37.9% (11)                       | 0.3887        |

\*Nursing facility includes skilled nursing facility and rehabilitation center.

**Table S12.** In-hospital causes of death

|                 |                 | <b>Sex</b> | <b>Age, years</b> | <b>Postoperative day</b> | <b>Immediate cause of death</b>         | <b>Cardiopulmonary-related death</b> |
|-----------------|-----------------|------------|-------------------|--------------------------|-----------------------------------------|--------------------------------------|
| <b>Bell OFF</b> | Per-protocol    | M          | 70.5              | 42                       | Pneumonia                               | Yes                                  |
|                 |                 | M          | 73.2              | 53                       | Sepsis due to acute respiratory failure | Yes                                  |
|                 |                 | M          | 74.8              | 9                        | Sustained ventricular tachycardia       | Yes                                  |
|                 | Intent-to-treat | F          | 87.3              | 4                        | Hypoxia due to respiratory arrest       | Yes                                  |
| <b>Bell ON</b>  | Per-protocol    | M          | 80.0              | 42                       | Sepsis due to pancreatic cyst abscess   | No                                   |

**Table S13.** Daily nursing workload

| Parameter                                                                 |                | Per-protocol                        |                                         |               | Intent-to-treat                     |                                         |               |
|---------------------------------------------------------------------------|----------------|-------------------------------------|-----------------------------------------|---------------|-------------------------------------|-----------------------------------------|---------------|
|                                                                           |                | Control<br>Bell OFF<br>Mean (95%CI) | Experimental<br>Bell ON<br>Mean (95%CI) | P value       | Control<br>Bell OFF<br>Mean (95%CI) | Experimental<br>Bell ON<br>Mean (95%CI) | P value       |
| Number of <i>Episodes</i><br>reminded patient to use IS                   | <b>Overall</b> | <b>3.0 (2.6-3.3)</b>                | <b>3.0 (2.7-3.4)</b>                    | <b>0.7746</b> | <b>2.9 (2.6-3.3)</b>                | <b>3.1 (2.8-3.4)</b>                    | <b>0.5051</b> |
|                                                                           | Non-elective   | 2.6 (2.2-3.0)                       | 3.0 (2.6-3.4)                           | 0.8223        | 2.6 (2.2-3.0)                       | 2.9 (2.6-3.4)                           | 0.4843        |
|                                                                           | Elective       | 3.5 (3.0-4.1)                       | 3.1 (2.6-3.8)                           | 0.8223        | 3.4 (2.9-3.9)                       | 3.3 (2.8-4.0)                           | 0.4843        |
| <i>Minutes</i> nurses spent<br>doing IS-related activities<br>per patient | <b>Overall</b> | <b>6.2 (5.5-7.0)</b>                | <b>6.8 (5.9-7.9)</b>                    | <b>0.3170</b> | <b>6.2 (5.5-6.9)</b>                | <b>6.7 (5.9-7.7)</b>                    | <b>0.8953</b> |
|                                                                           | Non-elective   | 5.7 (4.8-6.9)                       | 6.6 (5.6-7.7)                           | 0.4100        | 5.8 (4.8-6.8)                       | 6.5 (5.5-7.5)                           | 0.3873        |
|                                                                           | Elective       | 6.0 (5.1-7.0)                       | 6.0 (4.7 (7.9)                          | 0.4100        | 5.8 (5.0-6.7)                       | 6.1 (4.8-7.7)                           | 0.3873        |
