# Supplementary material
Source: PubMed Central journal article supplement (PMC6583822)
Supplement: jamasurg-154-579-s003.pdf [file jamasurg-154-579-s003.pdf]

## Data Sharing Statement

Eltorai. Effects of an Incentive Spirometer Patient Reminder After Coronary Artery Bypass Grafting. *JAMA Surg*. Published April 10, 2019. 10.1001/jamasurg.2019.0520

### Data

**Data available:** Yes

**Data types:** Deidentified participant data

**How to access data:** [adam\\_eltorai@brown.edu](mailto:adam_eltorai@brown.edu)

**When available:** With publication

### Supporting Documents

**Document types:** None

### Additional Information

**Who can access the data:** researchers whose proposed use of the data has been approved

**Types of analyses:** for a specified purpose

**Mechanisms of data availability:** with a signed data access agreement
